# Supplementary material for: The role of thermal annealing on the microstructures of (Ti, Fe)-alloyed Si thin-film anodes for high-performance Li-ion batteries
Source: Royal Society of Chemistry journal article supplement (doi:10.1039/c7ra13172k), 2018-01-01
Supplement: c7ra13172k1.pdf [file c7ra13172k1.pdf]

## Supplementary Information

### **The role of thermal annealing on the microstructures of (Ti, Fe)- alloyed Si thin-film anodes for high-performance Li-ion batteries**

M. Oh<sup>a</sup>, I. Kim<sup>a, b</sup>, H. J. Lee<sup>a</sup>, S. Hyun<sup>b\*</sup> and C. Kang<sup>a\*</sup>

*<sup>a</sup> School of Advanced Materials Science & Engineering, Sungkyunkwan University, Suwon, Republic of Korea.*

*<sup>b</sup> Nano-Convergence Mechanical Systems Research Division, Korea Institute of Machinery and Materials (KIMM), Daejeon, Republic of Korea*

*\*Co-corresponding authors: S. Hyun ([hyun@kimm.re.kr](mailto:hyun@kimm.re.kr)) and C. Kang ([chiwonkang@skku.edu](mailto:chiwonkang@skku.edu))*

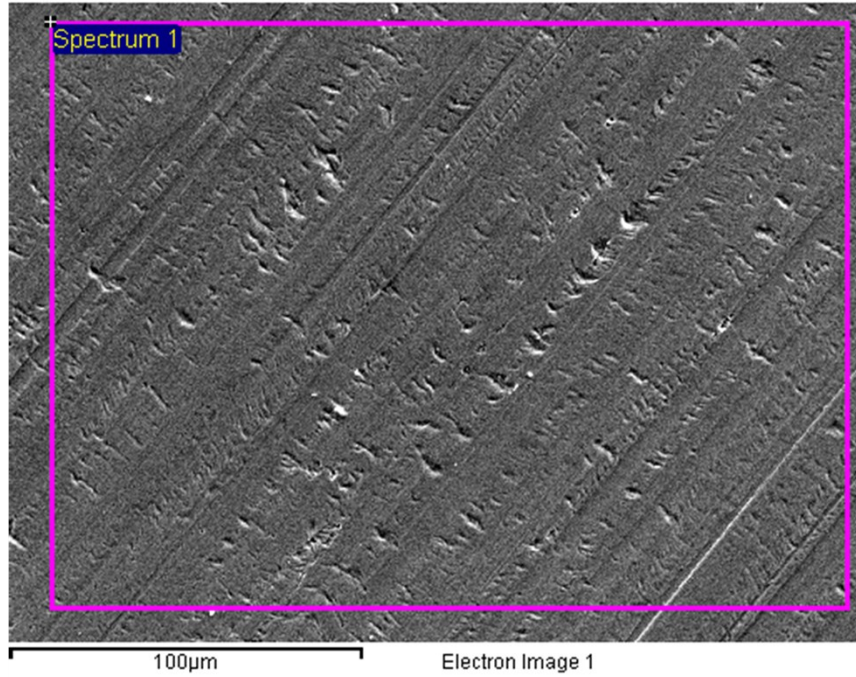

**(a)**

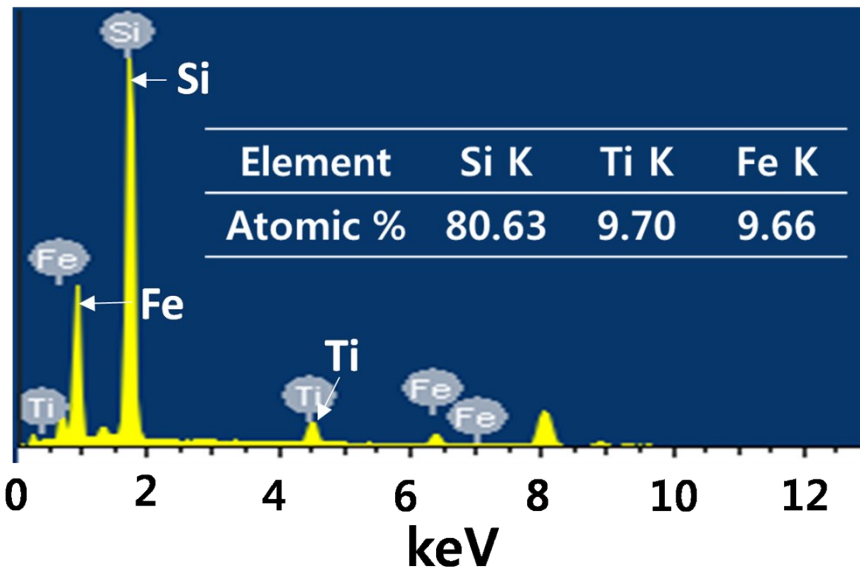

**(b)**

Figure S1. (a) SEM image of the as-deposited (Ti, Fe)-alloyed Si thin-film sample subjected to EDS analysis in the box. (b) EDS spectra of the sample showing the composition (at.%) (approximately 80 : 10 : 10 (= Si : Ti : Fe)).

Table S1. Elemental stoichiometry of the (Ti, Fe)-alloyed Si thin-film synthesized by different RF power densities of Si target.

|                 |                     | RF power density of Si target (W/cm <sup>2</sup> ) |      |      |      |       |      |
|-----------------|---------------------|----------------------------------------------------|------|------|------|-------|------|
|                 |                     | 7.4                                                | 8.63 | 9.87 | 11.1 | 12.33 | 14.8 |
| Composition (%) | Si / (Si+Ti+Fe) (%) | 77.0                                               | 78.5 | 80.5 | 81.5 | 82.5  | 84.0 |
|                 | Ti / (Si+Ti+Fe) (%) | 11.5                                               | 11.0 | 10.0 | 9.5  | 9.0   | 8.0  |
|                 | Fe / (Si+Ti+Fe) (%) | 11.5                                               | 10.5 | 9.5  | 9.0  | 8.5   | 8.0  |

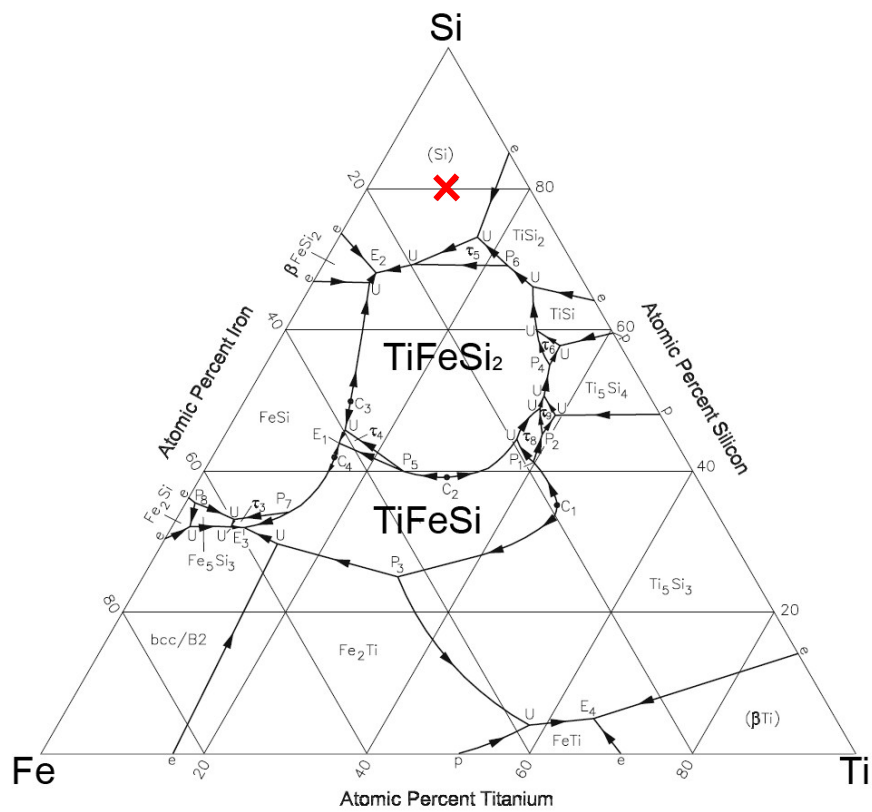

Figure S2. Ternary phase diagram of liquidus projection for Si-Ti-Fe three-component system [ref. JPEDAV (2009) 30:393–396]

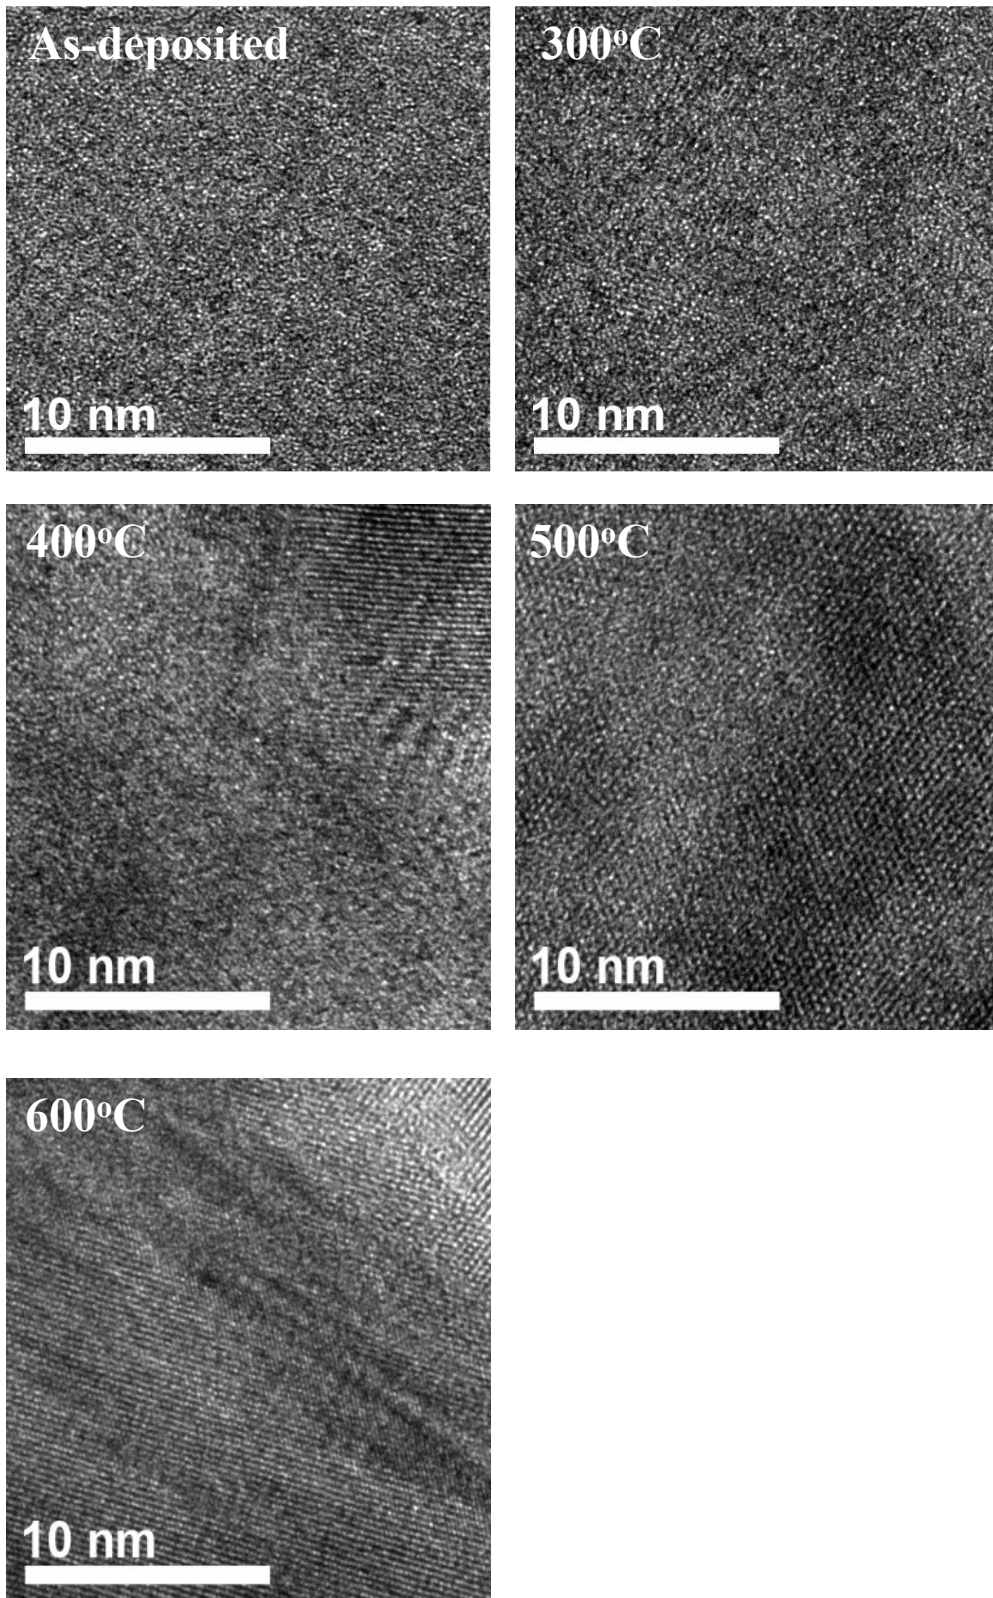

Figure S3. High-resolution electron micrographs of the (Ti, Fe)-alloyed Si thin-film samples annealed at the different temperatures. Note that these magnified micrographs are equivalent to those presented in the insets of Figure 2 in the main text.

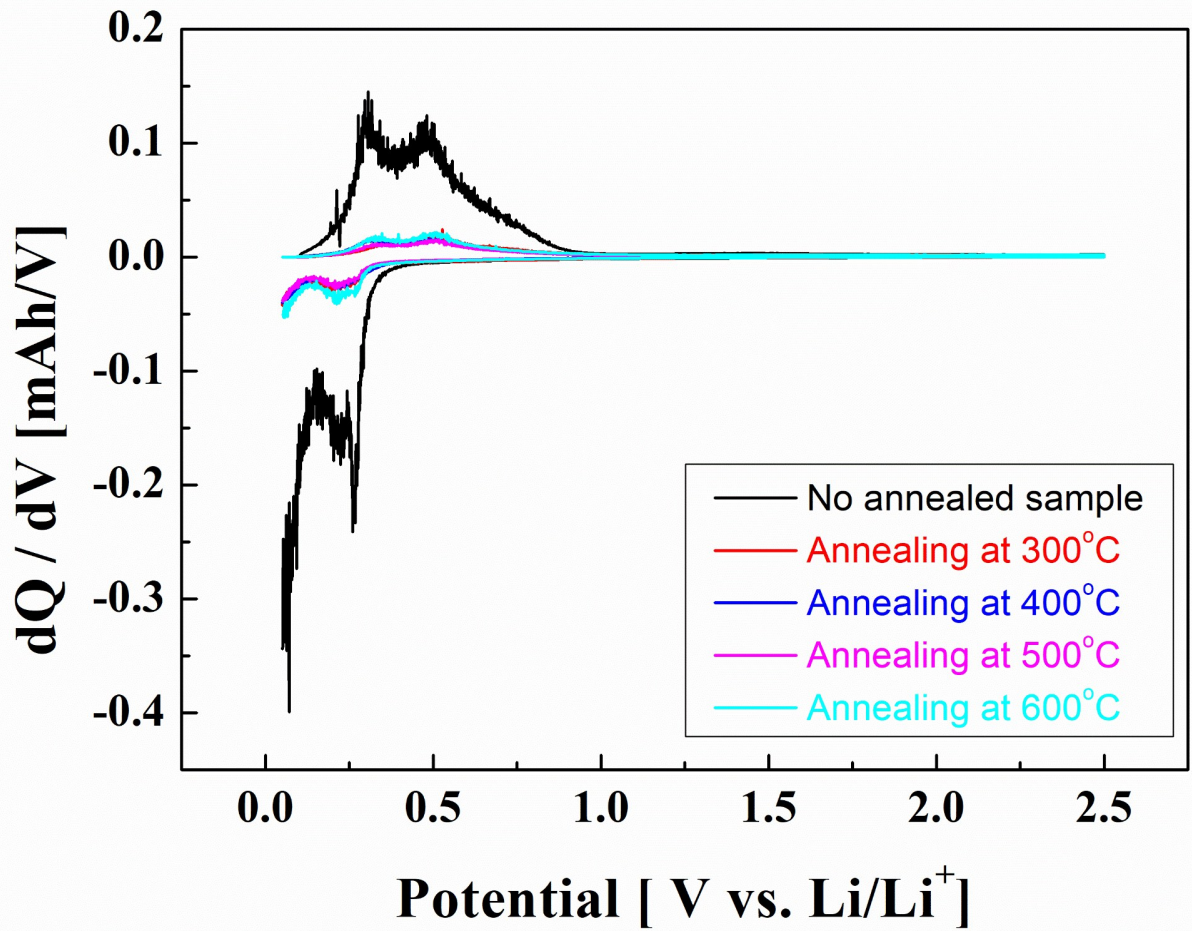

Figure S4. Differential capacity ( $dQ/dV$ ) versus potential of the (Ti, Fe)-alloyed Si thin-film samples annealed at the different temperatures.

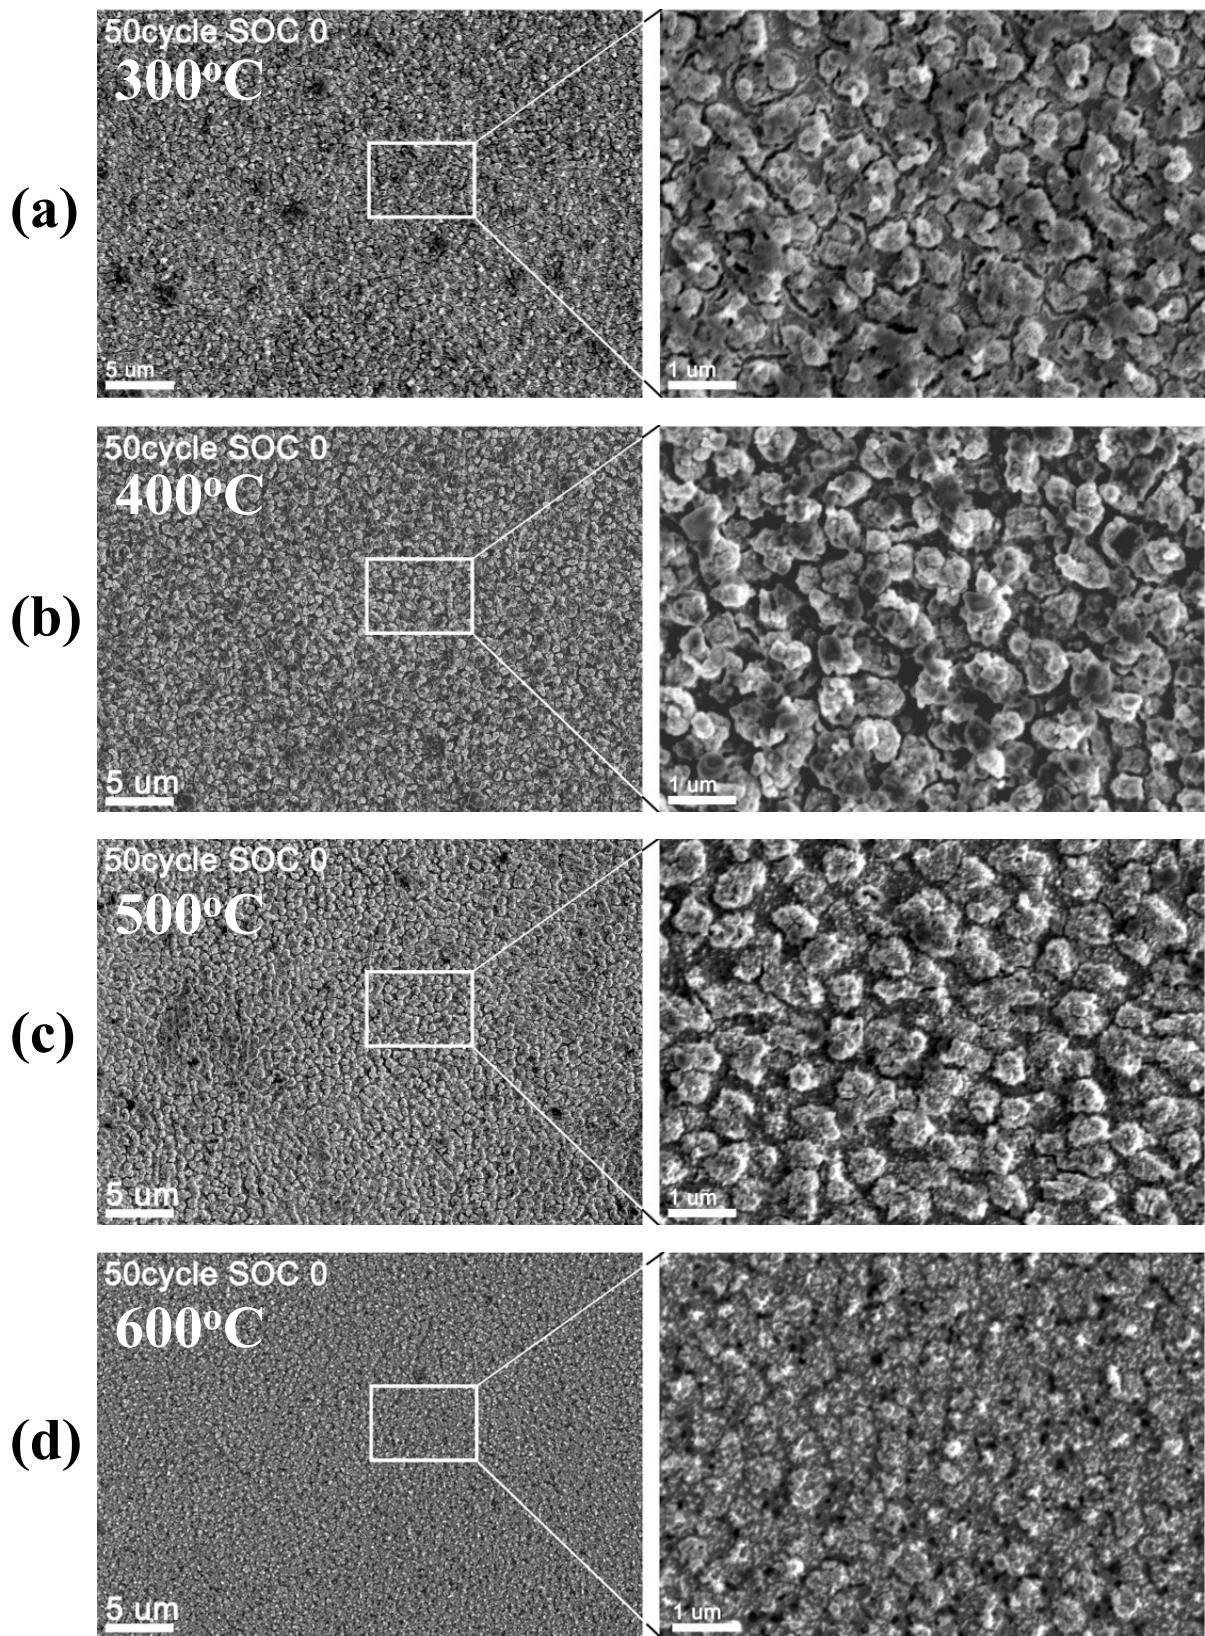

Figure S5. Surface morphological changes using FESEM for the 50 cycled samples annealed at the different temperatures.
